# Supplementary material for: Expression of Concern: TGFβ Activated Kinase 1 (TAK1) at the Crossroad of B Cell Receptor and Toll-Like Receptor 9 Signaling Pathways in Human B Cells
Source: PubMed Central journal article supplement (PMC8893696; doi:10.1371/journal.pone.0265030), 2022-03-03
Supplement: pone.0265030.s002.pdf [file pone.0265030.s002.pdf]

2010.06.24

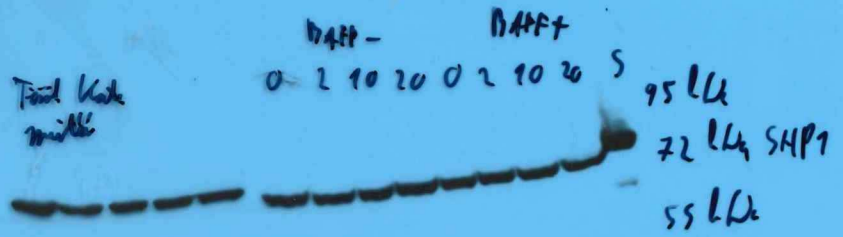

S 1 2 3 4

2010.06.24

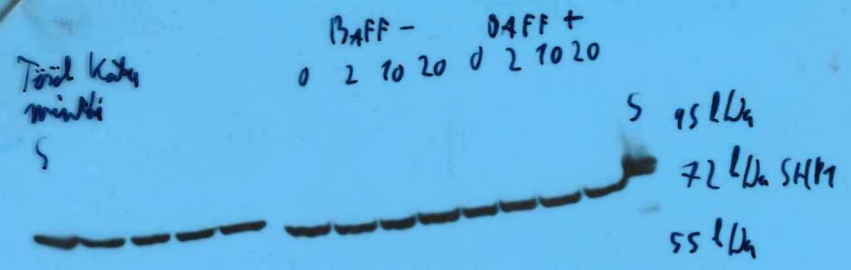

1 2 3 4
